## Correction

**Correction: Artocarpin, an isoprenyl flavonoid, induces p53-dependent or independent apoptosis via ROS-mediated MAPKs and Akt activation in non-small cell lung cancer cells****Ming-Horng Tsai<sup>1,\*</sup>, Ju-Fang Liu<sup>2,\*</sup>, Yao-Chang Chiang<sup>3,4</sup>, Stephen Chu-Sung Hu<sup>5,6</sup>, Lee-Fen Hsu<sup>7</sup>, Yu-Ching Lin<sup>7,8,9</sup>, Zih-Chan Lin<sup>10</sup>, Hui-Chun Lee<sup>1</sup>, Mei-Chuan Chen<sup>11</sup>, Chieh-Liang Huang<sup>3</sup>, Chiang-Wen Lee<sup>4,12,13,14</sup>**

<sup>1</sup>Department of Pediatrics, Division of Neonatology and Pediatric Hematology/Oncology, Chang Gung Memorial Hospital, Yunlin, Taiwan

<sup>2</sup>Central Laboratory, Shin-Kong Wu Ho-Su Memorial Hospital, Taipei, Taiwan

<sup>3</sup>Center for Drug Abuse and Addiction, China Medical University Hospital, China Medical University, Taichung, Taiwan

<sup>4</sup>Department of Nursing, Division of Basic Medical Sciences, Chang Gung University of Science and Technology, Chia-Yi, Taiwan

<sup>5</sup>Department of Dermatology, College of Medicine, Kaohsiung Medical University, Kaohsiung, Taiwan

<sup>6</sup>Department of Dermatology, Kaohsiung Medical University Hospital, Kaohsiung, Taiwan

<sup>7</sup>Department of Respiratory Care, Chang Gung University of Science and Technology, Chiayi Campus, Chiayi, Taiwan

<sup>8</sup>Division of Pulmonary and Critical Care Medicine, Chang Gung Memorial Hospital, Chiayi, Taiwan

<sup>9</sup>Department of Respiratory Care, Chang Gung University, Taoyuan, Taiwan

<sup>10</sup>Graduate Institute of Biomedical Sciences, Chang Gung University, Taoyuan, Taiwan

<sup>11</sup>Program for the Clinical Drug Discovery from Botanical Herbs, College of Pharmacy, Taipei Medical University, Taipei, Taiwan

<sup>12</sup>Chronic Diseases and Health Promotion Research Center, Chang Gung University of Science and Technology, Chia-Yi, Taiwan

<sup>13</sup>Research Center for Industry of Human Ecology and Research Center for Chinese Herbal Medicine, College of Human Ecology, Chang Gung University of Science and Technology, Taoyuan, Taiwan

<sup>14</sup>Department of Rehabilitation, Chang Gung Memorial Hospital, Chia-Yi 61363, Taiwan

\*These authors contributed equally to this work

**Published:** May 21, 2019

Copyright: Tsai et al. This is an open-access article distributed under the terms of the Creative Commons Attribution License (CC-BY), which permits unrestricted use, distribution, and reproduction in any medium, provided the original author and source are credited.

**This article has been corrected:** The new affiliation no.14 is given below:

**Chiang-Wen Lee<sup>14</sup>**

<sup>14</sup>Department of Rehabilitation, Chang Gung Memorial Hospital, Chia-Yi 61363, Taiwan

Original article: Oncotarget. 2017; 8:28342–28358. <https://doi.org/10.18632/oncotarget.16058>
